# Supplementary material
Source: Elsevier journal article supplement (https://www.sciencedirect.com/science/article/pii/S2173510712000705)
Supplement: mmc1 [file S2173510712000705:mmc1.pdf]

## CANCER DE RECTO - ESTADIFICACION DE IMAGEN

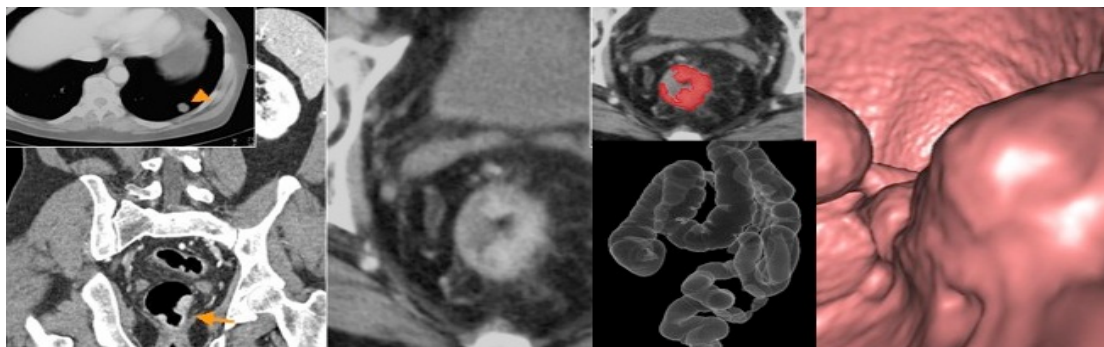

NOMBRE: \_\_\_\_\_ NHC: \_\_\_\_\_ FN: \_\_\_\_\_

### 1. CARACTERISTICAS MORFOLOGICAS DEL TUMOR

- CIRCUNFERENCIAL
- ANULAR afectando la luz de..... en punto, a .....en punto.
- POLIPOIDEO

POSIBLE NATURALEZA MUCINOSA

DISTANCIA A MARGEN ANAL: \_\_\_\_\_ cms

EXTENSION CRANEOCAUDAL: \_\_\_\_\_ cms

2. EXTENSION EXTRAMURAL: \_\_\_\_\_ mms

### 3. POSIBLE ESTADIO "T"

T1  T2  T3a  T3b  T3c  T3d  T4a  T4b

### 4. ESTADO DEL MARGEN DE RESECCION CIRCUNFERENCIAL (MRC)

- LIBRE: \_\_\_\_\_ mms
- COMPROMETIDO
- COMPROMETIDO Y CLARAMENTE VIOLADO
  - Por tumor
  - Por adenopatía maligna
  - Por invasión vascular extramural

## 5. SIGNOS DE INVASION VASCULAR EXTRAMURAL

- NEGATIVO
- DUDOSO (Indice 1 a 3)
- POSITIVO (Indice 4-5).

## 6. AFECTACION GANGLIONAR

-GANGLIOS SOSPECHOSOS

NUMERO

DISTANCIA MINIMA DE N+ al MRC\_\_\_\_\_mms

GANGLIOS EXTRAMESORRECTALES: ( ) SI ( )NO

Localización\_\_\_\_\_

### ESTADIO GANGLIONAR (N)

( )N0 ( ) N1 ( )N2

## 5. DATOS ESPECIFICOS DE TUMORES BAJOS

- AFECTACION MURAL CON PLANO INTERESFINTERICO LIBRE
- AFECTACION PLANO INTERESFINTERICO
- AFECTACION ESFINTER EXTERNO
- AFECTACION FOSA ISQUIOANAL

## 6. ESTADIFICACION A DISTANCIA

**-TC**

- AFECTACION HEPATICA
- AFECTACION PULMONAR
- AFECTACION GANGLIONAR

( ) OTRA

\_\_\_\_\_

**-PET**

\_\_\_\_\_
